# Supplementary material for: Genome-Wide Discovery of InDel Markers in Sesame (Sesamum indicum L.) Using ddRADSeq
Source: PubMed Central journal article supplement (PMC7599716; doi:10.3390/plants9101262), 2020-09-24
Supplement: plants-09-01262-s001.pdf [file plants-09-01262-s001.pdf]

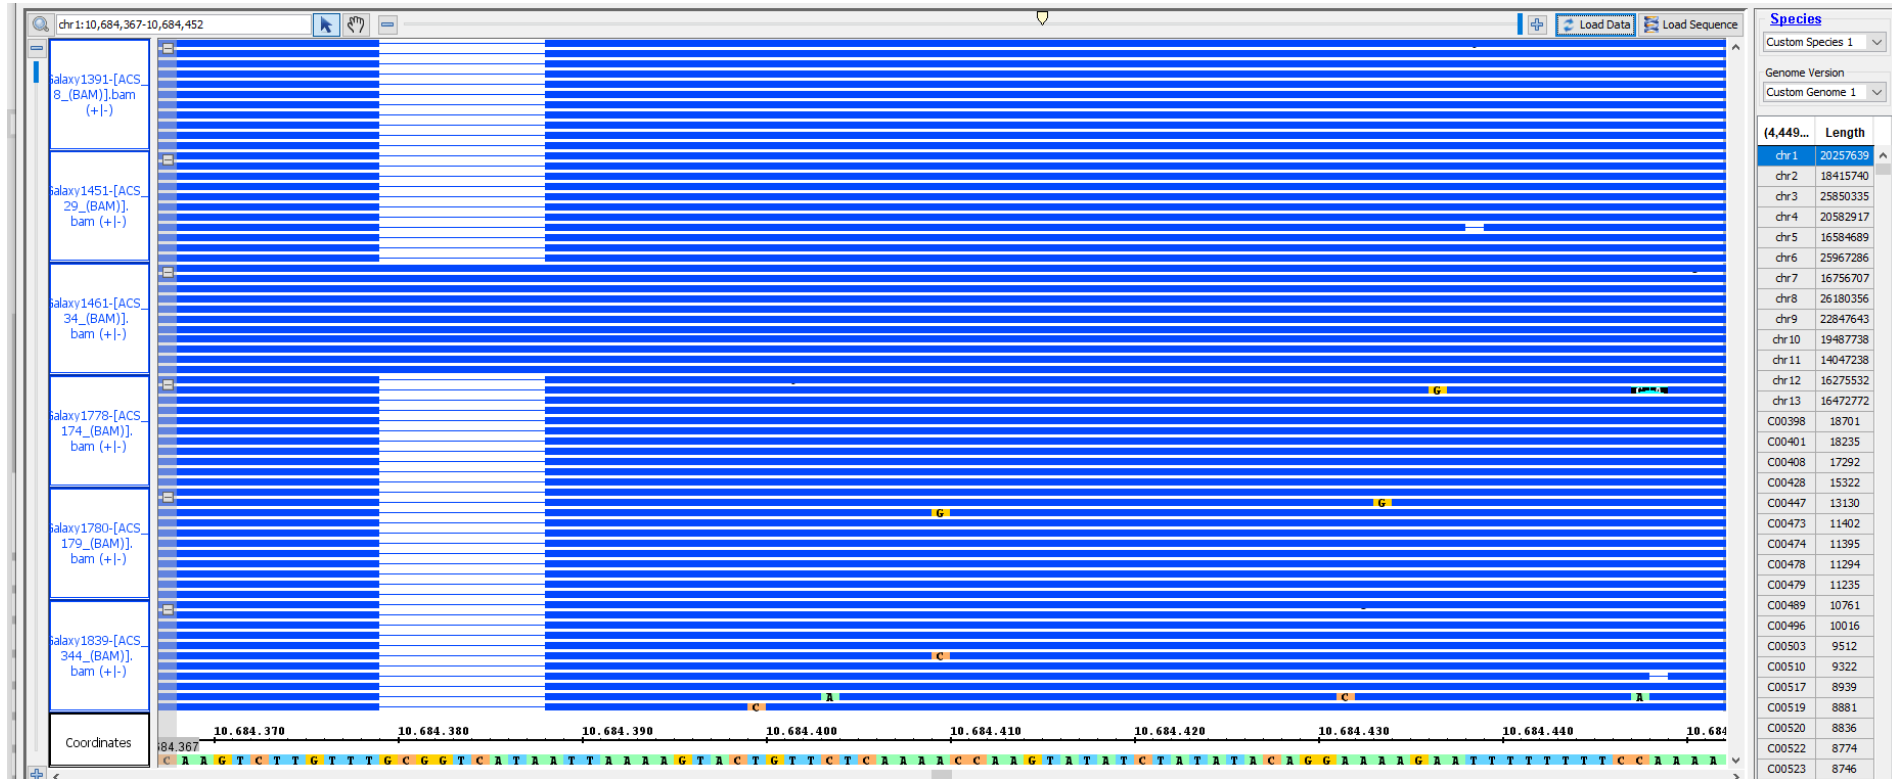

**Figure S1.** The software IGB shows the representative deletion in chromosome 1 (position 10.684.379-10.684.387). Gray colors are deleted sequences for each individual in that region. Coordinates indicates the reference genome sequence.

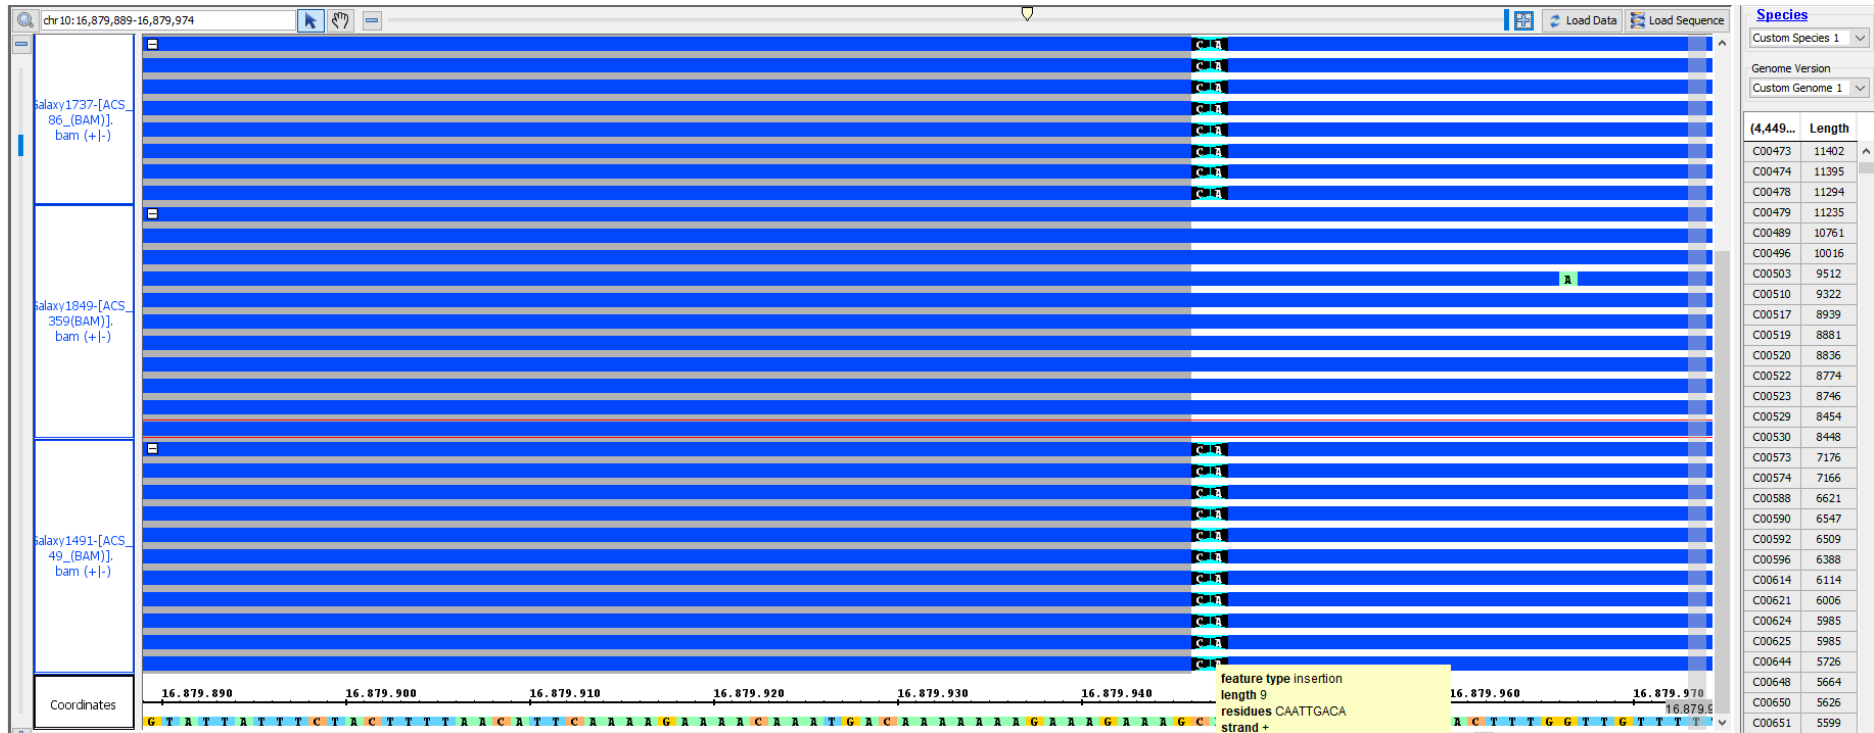

**Figure S2.** The software IGB shows the insertion in chromosome 10 (position 16,879,947-16,879,956). Green-black colors are inserted sequences for each individual in that region. Coordinates indicates the reference genome sequence.

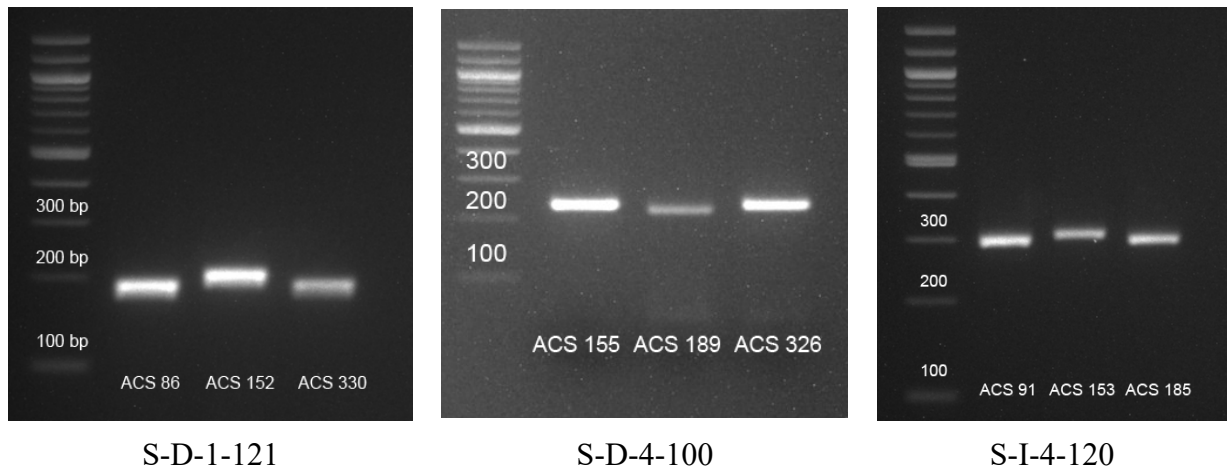

**Figure S3.** Amplification of sesame DNAs with use of selected markers (Ladder 100 bp)

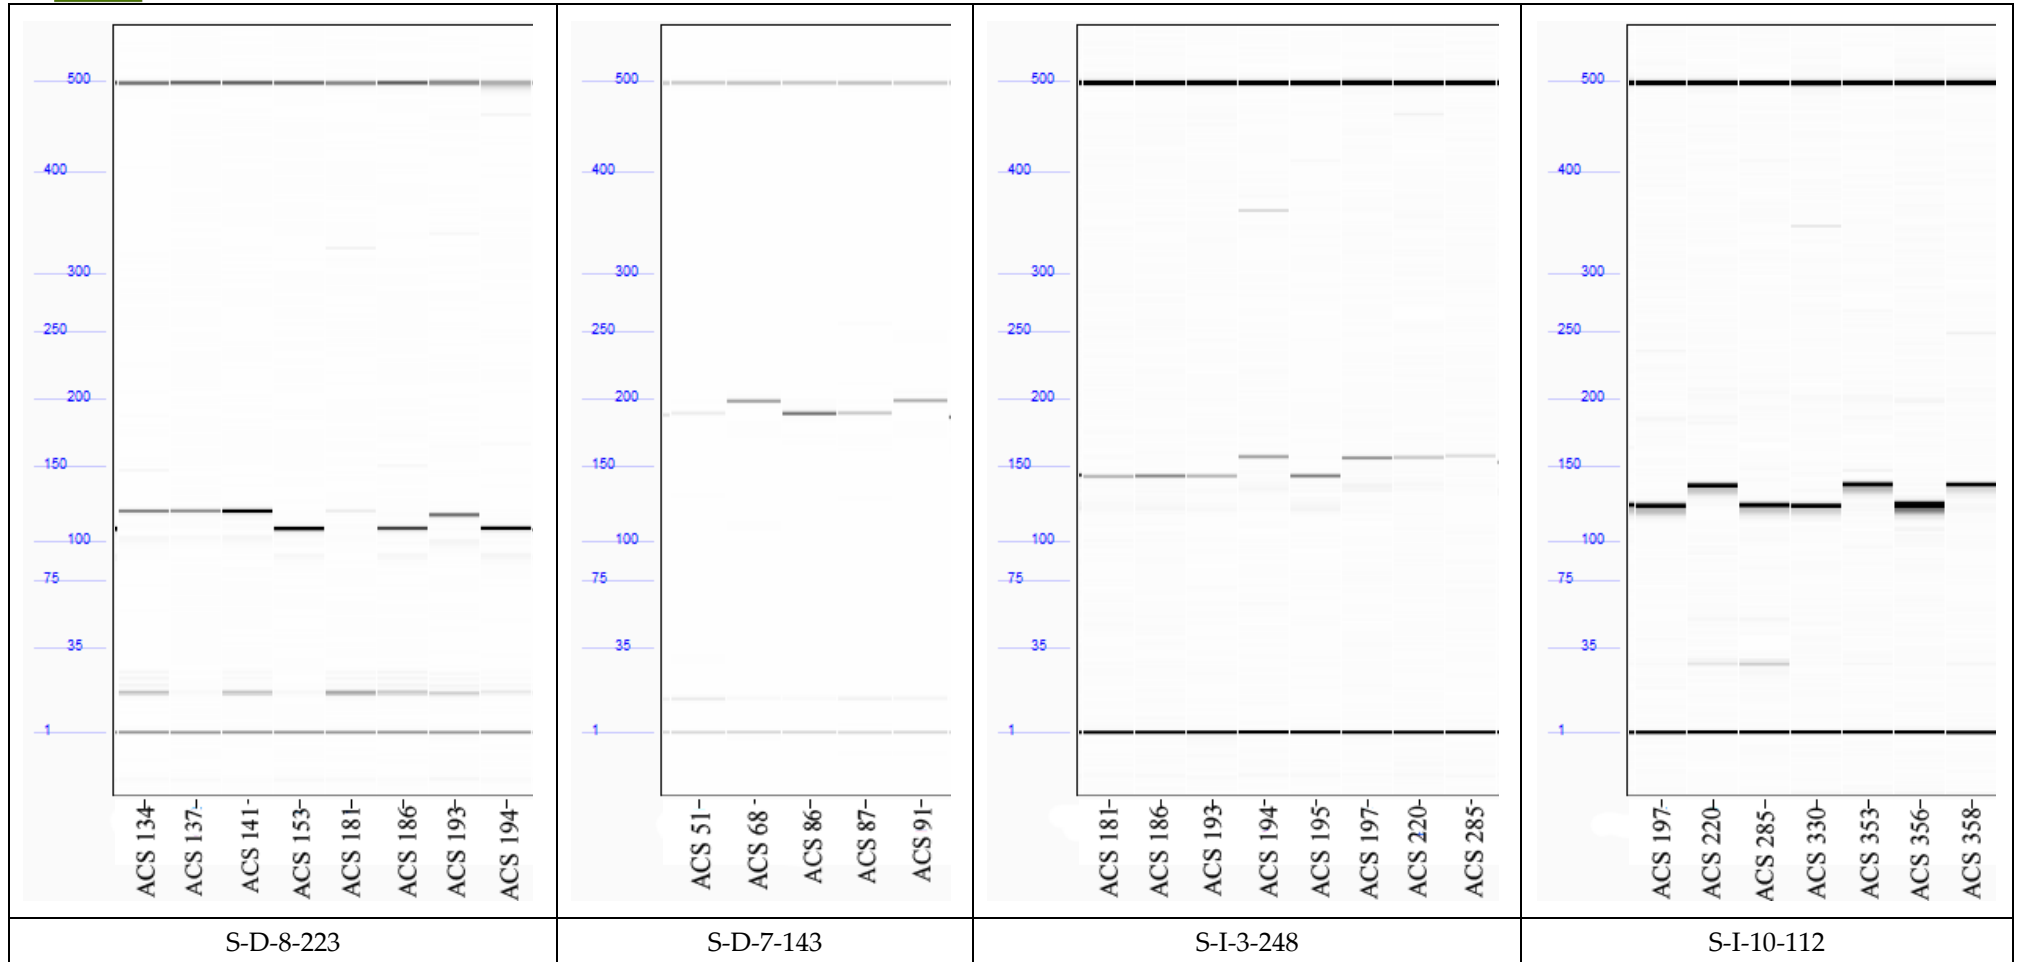

**Figure S4.** Fragment Analyzer™ shows the sample gel pictures of InDel marker profile for selected sesame accessions with a 1-500 bp ladder.

**Table S1.** List of the sesame accessions in the Mediterranean sesame core collection used ddRADSeq analysis.

| Accession No. | USDA Entry / Cultivar Name | Country of origin | Continent | Accession No. | USDA Entry / Cultivar Name | Country of origin | Continent |
|---------------|----------------------------|-------------------|-----------|---------------|----------------------------|-------------------|-----------|
| ACS 8         | PI 220403                  | Afghanistan       | Asia      | ACS 157       | PI 292147                  | Pakistan          | Asia      |
| ACS 10        | PI 220544                  | Afghanistan       | Asia      | ACS 158       | PI 292148                  | Pakistan          | Asia      |
| ACS 12        | PI 223532                  | Afghanistan       | Asia      | ACS 159       | PI 292149                  | Pakistan          | Asia      |
| ACS 15        | PI 223817                  | Afghanistan       | Asia      | ACS 163       | PI 426941                  | Pakistan          | Asia      |
| ACS 18        | PI 426218                  | Afghanistan       | Asia      | ACS 164       | PI 426942                  | Pakistan          | Asia      |
| ACS 19        | PI 426219                  | Afghanistan       | Asia      | ACS 168       | PI 426967                  | Pakistan          | Asia      |
| ACS 20        | PI 278160                  | Angola            | Africa    | ACS 174       | PI 258369                  | Russia            | Asia      |
| ACS 21        | PI 278161                  | Angola            | Africa    | ACS 179       | PI 263461                  | Russia            | Asia      |
| ACS 22        | PI 254710                  | Argentina         | America   | ACS 181       | PI 263461                  | Russia            | Asia      |
| ACS 24        | PI 158045                  | China             | Asia      | ACS 182       | PI 263465                  | Russia            | Asia      |
| ACS 26        | PI 158065                  | China             | Asia      | ACS 183       | PI 263469                  | Russia            | Asia      |
| ACS 28        | PI 162563                  | China             | Asia      | ACS 185       | PI 265513                  | Russia            | Asia      |
| ACS 29        | PI 195121                  | China             | Asia      | ACS 186       | PI 265517                  | Russia            | Asia      |
| ACS 32        | PI 436595                  | China             | Asia      | ACS 189       | PI 265522                  | Russia            | Asia      |
| ACS 34        | PI 436598                  | China             | Asia      | ACS 191       | PI 269965                  | Russia            | Asia      |
| ACS 36        | PI 436600                  | China             | Asia      | ACS 193       | PI 254698                  | S. America        | America   |
| ACS 38        | PI 436603                  | China             | Asia      | ACS 194       | PI 254698                  | S. America        | America   |
| ACS 40        | PI 532846                  | China             | Asia      | ACS 195       | PI 200113                  | Sri Lanka         | Asia      |
| ACS 43        | PI 200108                  | Egypt             | Africa    | ACS 197       | PI 253985                  | Syria             | Asia      |
| ACS 46        | PI 298629                  | Egypt             | Africa    | ACS 204       | PI 170710                  | Turkey            | Europe    |
| ACS 49        | PI 238989                  | Greece            | Europe    | ACS 215       | PI 170728                  | Turkey            | Europe    |
| ACS 51        | PI 238991                  | Greece            | Europe    | ACS 216       | PI 170729                  | Turkey            | Europe    |
| ACS 60        | PI 156999                  | India             | Asia      | ACS 218       | PI 170732                  | Turkey            | Europe    |
| ACS 65        | PI 347847                  | India             | Asia      | ACS 220       | PI 170739                  | Turkey            | Europe    |
| ACS 68        | PI 257471                  | India             | Asia      | ACS 234       | PI 175907                  | Turkey            | Europe    |
| ACS 70        | PI 222266                  | Iran              | Asia      | ACS 241       | PI 179034                  | Turkey            | Europe    |
| ACS 71        | PI 223014                  | Iran              | Asia      | ACS 242       | PI 179481                  | Turkey            | Europe    |
| ACS 72        | PI 223411                  | Iran              | Asia      | ACS 246       | PI 179490                  | Turkey            | Europe    |
| ACS 73        | PI 227253                  | Iran              | Asia      | ACS 253       | PI 238427                  | Turkey            | Europe    |
| ACS 74        | PI 229790                  | Iran              | Asia      | ACS 278       | PI 240856                  | Turkey            | Europe    |
| ACS 76        | PI 250748                  | Iran              | Asia      | ACS 285       | Landrace                   | Turkey            | Europe    |
| ACS 80        | PI 250894                  | Iran              | Asia      | ACS 304       | PI 238446                  | Turkey            | Europe    |
| ACS 81        | PI 250944                  | Iran              | Asia      | Ozberk-82     | Cultivar                   | Turkey            | Europe    |
| ACS 86        | PI 343821                  | Iran              | Asia      | Muganli-57    | Cultivar                   | Turkey            | Europe    |
| ACS 87        | PI 343821                  | Iran              | Asia      | ACS 325       | PI 254709                  | USA               | America   |
| ACS 88        | PI 381030                  | Iran              | Asia      | ACS 326       | PI 254709                  | USA               | America   |

|         |           |          |      |         |           |           |         |
|---------|-----------|----------|------|---------|-----------|-----------|---------|
| ACS 91  | PI 198157 | Iraq     | Asia | ACS 329 | PI 280791 | USA       | America |
| ACS 108 | PI 285170 | Israel   | Asia | ACS 330 | PI 280791 | USA       | America |
| ACS 109 | PI 285171 | Israel   | Asia | ACS 331 | PI 280794 | USA       | America |
| ACS 122 | PI 207667 | Japan    | Asia | ACS 335 | PI 280812 | USA       | America |
| ACS 134 | PI 490031 | S. Korea | Asia | ACS 337 | PI 542048 | USA       | America |
| ACS 137 | PI 490045 | S. Korea | Asia | ACS 344 | PI 599446 | USA       | America |
| ACS 139 | PI 490046 | S. Korea | Asia | ACS 348 | PI 599455 | USA       | America |
| ACS 141 | PI 490049 | S. Korea | Asia | ACS 353 | PI 599493 | USA       | America |
| ACS 145 | PI 200107 | Myanmar  | Asia | ACS 356 | PI 153514 | Venezuela | America |
| ACS 152 | PI 200427 | Pakistan | Asia | ACS 358 | PI 254702 | Venezuela | America |
| ACS 153 | PI 250228 | Pakistan | Asia | ACS 359 | PI 320960 | Venezuela | America |
| ACS 155 | PI 292144 | Pakistan | Asia |         |           |           |         |

---
